# Supplementary material
Source: Springer Nature journal article supplement (https://www.springermedizin.de/resource/supplementary/12990_2007_116_MOESM3_ESM.pdf/9612604)

A

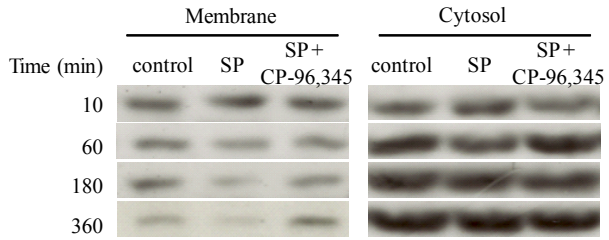

B

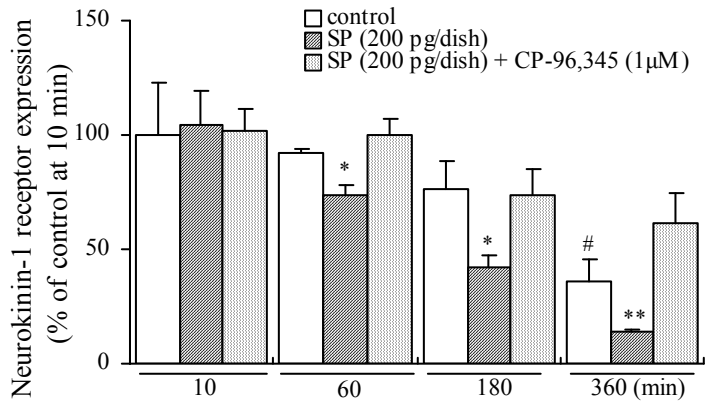

C

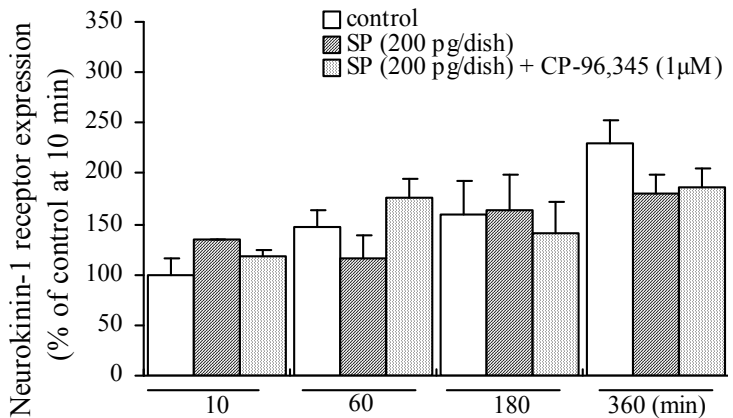

Supplement: MOESM3 [file 9612604]
